# Supplementary material
Source: Research Square preprint supplement (doi:10.21203/rs.3.rs-9481815/v1)
Supplement: Supplementary file 1 [file 7e3f917ab798582fa9345ed2.xlsx]

## Sheet: PK
INSTRUCTION / EXPLANATION	JobID From Synapse Tracker	Site-specific Experiment Identfier Experiment number (e.g. from ELN)	Internal Compound ID Internal Compound ID (From GRIT42)	Internal Compound Batch ID Internal Batch ID (Batch Id from Grit)	External Compound ID External Compound ID (Asset name, e.g TBAJ-587)	External Batch ID External Batch ID (Manufacturing batch number)	Module Number Module number as per Pipeine specification	Asset Progression Plan	Individual animal identifier Concatenation of ('EXPID','/' ,'ID') to make SUBJECT_ID Unique	ID. One unique value per animal inserted on all records. Consecutive ID number for all animals in particular experiment.	Internal Individual Animal Identifier	Grouping Variable on the basis of Treatment and dosage level. E,g, TREATMENT-GROUP-1,CONTROL-VEHICLE-GROUP,CTRL-INFECTION-GROUP	Date of PK sampling. Format YYYY-MM-DD	PK sampling timepoints in clock-time Format: 24hr Clock e.g. 13:14, 09:10	PK sampling timepoints post-dose (for example: 0.1, 0.5, 1, 2, 4, 7 h post-dose)	Unit for sampling time. E.g. hours.	Compound 1 Name	Concentration of Compound 1 For missing information, insert "-99". If below limit of quantification (LLOQ), insert reported value or if unavailable LLOQ.	Dose of Compound 1	Active Compound Name	Concentration of Active Compound For missing information, insert "-99". If below limit of quantification (LLOQ), insert reported value or if unavailable LLOQ.	Normalised Unit fot Blood concentration irrespective of blood concentration type e.g. ng/mL Unit of COMPOUND_1 should not be expressed as ACTIVE_COMPOUND equivalent	Normalised Unit for Dose administered irrespective of compound type e.g. mg/kg	Route sampled (for example tail vein, jugular vein, …)	Type of sample tested (e.g. Blood/Plasma/Lung)	Study design type (sparse-first dose, rich-steady steate)	REGI. Randomised to regimen (Insert label of each study arm which also should include dose level separated by "-".).	FEED -FASTED STATE - FED STATE	Severity or extent of disease. Inserted on all records per subject. - UNAFFECTED, - SLIGHTLY AFFECTED (less curious, slower movements, slightly ruffled fur), - AFFECTED (prefers to be stationary, ruffled fur), - CLEARLY AFFECTED (moves only when manipulated, ruffled fur, half closed eyes), - HIGHLY AFFECTED(does not moves when manipulated, ruffled fur, closed eyes, cooler to the touch. Euthanize.)	Comments Field
VARIABLE	STUDYID	EXP_ID	CPD_ID	BATCH_ID	EXT_CPD_ID	EXT_BATCH_ID	MODULE	APP	SUBJECT_ID	ID	PMI	GROUP_ID	PK_SAMPLING_DATE	PK_SAMPLING_TP_CT	PK_SAMPLING_TP_PD	UNIT_SAMPLING_TP	COMPOUND_1	COMPOUND_1_CONC	COMPOUND_1_DOSE	ACTIVE_COMPOUND	ACTIVE_COMPOUND_CONC	CONC_UNIT	DOSE_UNIT	SAMPLING_LOCATION	SAMPLE_TESTED	STUDY_DESIGN	REGIMEN	FEED	SEVER	COMMENT
	#REF!

## Sheet: PD
INSTRUCTION / EXPLANATION	JobID From Synapse Tracker	Site-specific Experiment Identfier Experiment number (e.g. from ELN)	Internal Compound ID Internal Compound ID (From GRIT42)	Internal Compound Batch ID Internal Batch ID (Batch Id from Grit)	External Compound ID External Compound ID (Asset name, e.g TBAJ-587)	External Batch ID External Batch ID (Manufacturing batch number)	Module Number Module number as per Pipeine specification	Asset Progression Plan	Individual animal identifier Concatenation of ('EXPID','/' ,'ID') to make SUBJECT_ID Unique	ID. One unique value per animal inserted on all records. Consecutive ID number for all animals in particular experiment.	Internal Individual Animal Identifier	Grouping Variable on the basis of Treatment and dosage level. E,g, TREATMENT-GROUP-1,CONTROL-VEHICLE-GROUP,CTRL-INFECTION-GROUP	Date. Format YYYY-MM-DD	Time_Point. lock-time of euthanizing the animal for CFU determination. Format: 24hr Clock e.g. 13:14, 09:10	Tissue analyzed	Dependent variable. Log10 CFU given for each day and replicate. For missing information, insert "-99". If below limit of quantification (LLOQ), insert reported value or if unavailable LLOQ.	Unit For CFU Count	Sample status for CFU counts. Contaminated (1), No growth (2), No result (3), Not done (4), Positive (5).	Time To Positivity for CFU Samples Dependent variable. TTP given for each day and replicate in hours. If negative at day 42, then the sample is negative/No Growth and write 9999	Unit of TTP	Replicate number. (Inserted on all records as 1 or 2)	REGI. Randomised to regimen (Insert label of each study arm which also should include dose level separated by "-".).	Weight. Individual bodyweight per animal closest to date of PD determination. If weight was not measured, fill with '-99'	Unit of Mouse Weight	Severity or extent of disease. Inserted on all records per subject. - UNAFFECTED, - SLIGHTLY AFFECTED (less curious, slower movements, slightly ruffled fur), - AFFECTED (prefers to be stationary, ruffled fur), - CLEARLY AFFECTED (moves only when manipulated, ruffled fur, half closed eyes), - HIGHLY AFFECTED(does not moves when manipulated, ruffled fur, closed eyes, cooler to the touch. Euthanize.)	Culture Incubation Time (days)	Culture Media Type	Comments Field
VARIABLE	STUDYID	EXP_ID	CPD_ID	BATCH_ID	EXT_CPD_ID	EXT_BATCH_ID	MODULE	APP	SUBJECT_ID	ID	PMI	GROUP_ID	DATE_PD	PD_Time_CT	TISSUE	CFU_COUNT	CFU_UNIT	CFU_STATUS	TTP_CFU	TTP_CFU_UNIT	REPLICATE	REGIMEN	WEIGHT	WEIGHT_UNIT	SEVER	INCUBATION_TIME	MEDIATYPE	COMMENT
	#REF!

## Sheet: Maldi_Sample_Preparation
INSTRUCTION / EXPLANATION	JobID From Synapse Tracker	Site-specific Experiment Identfier Experiment number (e.g. from ELN)	Internal Compound ID Internal Compound ID (From GRIT42)	Internal Compound Batch ID Internal Batch ID (Batch Id from Grit)	External Compound ID External Compound ID (Asset name, e.g TBAJ-587)	External Batch ID External Batch ID (Manufacturing batch number)	Module Number Module number as per Pipeine specification	Asset Progression Plan	Individual animal identifier Concatenation of ('EXPID','/' ,'ID') to make SUBJECT_ID Unique	ID. One unique value per animal inserted on all records. Consecutive ID number for all animals in particular experiment.	Internal Individual Animal Identifier	Analysis Date. Format YYYY-MM-DD	Tissue analyzed	Chamber temperature (ºC)	Sample temperature (ºC)	Temperature Unit	Sprayer method	Matrix	Section Number	Slide Barcode	Slice Thickness (12/14/16 um)		Sections mounted on the slide	Distance between sections (number of sections taken between collected sections)	LCMS sections	Histology Sections	Histology type	Histology data file	Other sections	Deviation of the protocol/SOP	Comments Field
VARIABLE	STUDYID	EXP_ID	CPD_ID	BATCH_ID	EXT_CPD_ID	EXT_BATCH_ID	MODULE	APP	SUBJECT_ID	ID	PMI	DATE_CRIOSECTIONING	TISSUE	CHAMBER_TEMP	SAMPLE_TEMP	TEMP_UNIT	SPRAYER_METHOD	MATRIX	SECTION_NUMBER	SLIDE_BARCODE_NUMBER	SLICE_THICKNESS	SLICE_THICKNESS_UNIT	NO_OF_SECTION_MOUNTED	SECTION_DISTANCE	LCMS_SECTIONS	HISTOLOGY_SECTIONS	HISTOLOGY_TYPE	HISTOLOGY_DATA_FILE	OTHER_SECTIONS	PROTCOL_DEVIATION	COMMENT
	#REF!	ELN28297	Ethambutol	E1850000	GF133424A	EC/18824	M9.2.1	NA	#NAME?	M8		2021-09-07	lung	-25	-25		HCCA_Standard_01	HCCA (7mg/mL ) 0.2%TFA ACN/H2O (80/20)	23	9486	12				yes	yes	Eosin&Hematoxin stain
		ELN28297	Ethambutol	E1850000	GF133424A	EC/18824	M9.2.1	NA	#NAME?	M11		2021-09-07	lung	-25	-25		HCCA_Standard_01	HCCA (7mg/mL ) 0.2%TFA ACN/H2O (80/20)	1	9487	12				yes	yes	Eosin&Hematoxin stain
		ELN28297	Ethambutol	E1850000	GF133424A	EC/18824	M9.2.1	NA	#NAME?	M3		2021-09-07	lung	-25	-25		HCCA_Standard_01	HCCA (7mg/mL ) 0.2%TFA ACN/H2O (80/20)	34	9488	12				yes	yes	Eosin&Hematoxin stain

## Sheet: Maldi_Conditions
INSTRUCTION / EXPLANATION	JobID From Synapse Tracker	Site-specific Experiment Identfier Experiment number (e.g. from ELN)	Internal Compound ID Internal Compound ID (From GRIT42)	Internal Compound Batch ID Internal Batch ID (Batch Id from Grit)	External Compound ID External Compound ID (Asset name, e.g TBAJ-587)	External Batch ID External Batch ID (Manufacturing batch number)	Module Number Module number as per Pipeine specification	Asset Progression Plan	Individual animal identifier Concatenation of ('EXPID','/' ,'ID') to make SUBJECT_ID Unique	ID. One unique value per animal inserted on all records. Consecutive ID number for all animals in particular experiment.	Internal Individual Animal Identifier	Grouping Variable on the basis of Treatment and dosage level. E,g, TREATMENT, NON-TREATED,CONTROL	Tissue analyzed (lung…	Date. Format YYYY-MM-DD	Date. Format YYYY-MM-DD	Slide Barcode	Mass spectrometer (Bruker Ultraflextreme TOF)	Ionisation mode (Positive, Negative)	Sample Filename- raw data	Sample Filename- processed data	Image Filename	Method type	Flex Control Method	Autoxecute method	Mass range	Targeted Precursor m/z	Major fragment ion	Laser frequency	Shots per pixel	Image Resolution (pixels)	Limit Of Detection (µg/g)	Lower Limit Of Quantitation (µg/g)	Upper Limit Of Quantitation (µg/g)	Comments Field
VARIABLE	STUDYID	EXP_ID	CPD_ID	BATCH_ID	EXT_CPD_ID	EXT_BATCH_ID	MODULE	APP	SUBJECT_ID	ID	PMI	GROUP_ID	TISSUE	DATE_MALDI	MALDI_IMAGE_ACQUISATION_DATE	SLIDE_BARCODE	MASS_SPECTROMETER	IONISATION_MODE	SAMPLE_RAW_FILENAME	SAMPLE_PROCESSED_FILENAME	IMAGE_FILENAME	METHOD_TYPE	FLEX_CONTROL_METHOD	AUTOEXECUTE_METHOD	MASS_RANGE	TARGATED_PRECURSOR	MAJOR_FRAGMENT_ION	LASER_FREQUENCY	SHOTS_PER_PIXEL	IMAGE_RESOLUTION	LOD	LLOQ	ULOQ	COMMENT
	#REF!	ELN28297	Ethambutol	E1850000	GF133424A	EC/18824	M9.2.1	NA	ELN28297/M8	M8		TREATMENT GROUP 1	Lung	2021-09-07	2021-09-07	9486	Bruker Ultraflextreme TOF	Positive			image1	Full scan	Lift-imaging	Imaging-FC33-Jaime-Lift imaging 30uM	50-350	205.1	115.1	90	1000	50um		2	50
		ELN28297	Ethambutol	E1850000	GF133424A	EC/18824	M9.2.1	NA	ELN28297/M11	M11		TREATMENT GROUP 1	Lung	2021-09-07	2021-09-07	9487	Bruker Ultraflextreme TOF	Positive			image4	Full scan	Lift-imaging	Imaging-FC33-Jaime-Lift imaging 30uM	50-350	205.1	115.1	90	1000	50um		2	50
		ELN28297	Ethambutol	E1850000	GF133424A	EC/18824	M9.2.1	NA	ELN28297/M3	M3		TREATMENT GROUP 1	Lung	2021-09-07	2021-09-07	9488	Bruker Ultraflextreme TOF	Positive			image10	Full scan	Lift-imaging	Imaging-FC33-Jaime-Lift imaging 30uM	50-350	205.1	115.1	90	1000	50um		2	50
				¡

## Sheet: Maldi_Raw_Data
INSTRUCTION / EXPLANATION	JobID From Synapse Tracker	Site-specific Experiment Identfier Experiment number (e.g. from ELN)	Internal Compound ID Internal Compound ID (From GRIT42)	Internal Compound Batch ID Internal Batch ID (Batch Id from Grit)	External Compound ID External Compound ID (Asset name, e.g TBAJ-587)	External Batch ID External Batch ID (Manufacturing batch number)	Module Number Module number as per Pipeine specification	Asset Progression Plan	Individual animal identifier Concatenation of ('EXPID','/' ,'ID') to make SUBJECT_ID Unique	ID. One unique value per animal inserted on all records. Consecutive ID number for all animals in particular experiment.	Internal Individual Animal Identifier	Grouping Variable on the basis of Treatment and dosage level. E,g, TREATMENT, NON-TREATED,CONTROL	Tissue analyzed (lung…	Date. Format YYYY-MM-DD	Raw Data - Repository
VARIABLE	STUDYID	EXP_ID	CPD_ID	BATCH_ID	EXT_CPD_ID	EXT_BATCH_ID	MODULE	APP	SUBJECT_ID	ID	PMI	GROUP_ID	TISSUE	MALDI_IMAGE_ACQUISATION_DATE	File name and location
	#REF!	ELN28297	Ethambutol	E1850000	GF133424A	EC/18824	M9.2.1	NA	ELN28297/M8	M8		TREATMENT GROUP 1	Lung	2021-09-07	:c/maldi
		ELN28297	Ethambutol	E1850000	GF133424A	EC/18824	M9.2.1	NA	ELN28297/M11	M11		TREATMENT GROUP 1	Lung	2021-09-07	:c/maldi
		ELN28297	Ethambutol	E1850000	GF133424A	EC/18824	M9.2.1	NA	ELN28297/M3	M3		TREATMENT GROUP 1	Lung	2021-09-07

## Sheet: Maldi_Quantitative_Analysis
INSTRUCTION / EXPLANATION	JobID From Synapse Tracker	Site-specific Experiment Identfier Experiment number (e.g. from ELN)	Internal Compound ID Internal Compound ID (From GRIT42)	Internal Compound Batch ID Internal Batch ID (Batch Id from Grit)	External Compound ID External Compound ID (Asset name, e.g TBAJ-587)	External Batch ID External Batch ID (Manufacturing batch number)	Module Number Module number as per Pipeine specification	Asset Progression Plan	Individual animal identifier Concatenation of ('EXPID','/' ,'ID') to make SUBJECT_ID Unique	ID. One unique value per animal inserted on all records. Consecutive ID number for all animals in particular experiment.	Internal Individual Animal Identifier	Grouping Variable on the basis of Treatment and dosage level. E,g, TREATMENT, NON-TREATED,CONTROL	Time point (h) after last dosing of each compound	Tissue analyzed (lung…	Date. Format YYYY-MM-DD	Region of Interest	Concetration in Region of Interest	Concentration unit (ng/g or µg/g or mg/g or nM or µM or mM)	ROI size (mm2)	Date. Date of Sacrifice. Format YYYY-MM-DD	Comments Field
VARIABLE	STUDYID	EXP_ID	CPD_ID	BATCH_ID	EXT_CPD_ID	EXT_BATCH_ID	MODULE	APP	SUBJECT_ID	ID	PMI	GROUP_ID	TIME_AFTER_DOSE	TISSUE	DATE_MALDI	ROI	CONC	CONC_UNIT	ROI_SIZE	SACRIFICE_DATE	COMMENT
	#REF!	ELN28297	Ethambutol	E1850000	GF133424A	EC/18824	M9.2.1	NA	ELN28297/M8	M8		TREATMENT GROUP 1	0.75	lung	2021-09-07	Entire section	9.7	µg/g
		ELN28297	Ethambutol	E1850000	GF133424A	EC/18824	M9.2.1	NA	ELN28297/M11	M11		TREATMENT GROUP 1	6	lung	2021-09-07	Entire section	2.6	µg/g
		ELN28297	Ethambutol	E1850000	GF133424A	EC/18824	M9.2.1	NA	ELN28297/M3	M3		TREATMENT GROUP 1	24	lung	2021-09-07	Entire section	<LLOQ	µg/g

## Sheet: LMM Significant Features
Modality	Filter	Type	Features
CT	Gradient	First Order	10Percentile, Median
		GLCM	DifferenceAverage, DifferenceEntropy
		NGTDM	Contrast
	LoG (0.25mm)	First Order	Entropy, InterquartileRange, MeanAbsoluteDeviation, RobustMeanAbsoluteDeviation
		GLCM	Contrast, DifferenceAverage, DifferenceEntropy, JointEntropy, DependenceVariance
		NGTDM	Complexity
	LoG (0.50mm)	GLDM	DependenceVariance, LargeDependenceEmphasis, LongRunEmphasis, DifferenceAverage, DependenceEntropy, DependenceVariance
	LoG (0.75mm)	GLRLM	RunVariance
	Original	First Order	Entropy, Mean, Median, RootMeanSquared, Skewness
		GLCM	DifferenceAverage, DifferenceEntropy, SumEntropy
		GLDM	DependenceVariance
		SHAPE	LeastAxisLength, Maximum2DDiameterSlice, MinorAxisLength
	Square	First Order	Entropy, Median
		GLCM	DifferenceEntropy, Id, Idm, JointEntropy, MaximumProbability, SumEntropy
		GLDM	DependenceEntropy, DependenceVariance, LargeDependenceEmphasis, LargeDependenceLowGrayLevelEmphasis, LowGrayLevelEmphasis, RunPercentage
	Squareroot	First Order	Mean, Median, RootMeanSquared, Skewness
		GLCM	DifferenceVariance, JointEntropy, DependenceEntropy
		GLSZM	ZoneEntropy
		NGTDM	Strength
PET	Gradient	First Order	Mean, RootMeanSquared, Skewness, Median
		GLDM	LargeDependenceEmphasis, SmallDependenceHighGrayLevelEmphasis, LargeDependenceHighGrayLevelEmphasis, LargeDependenceLowGrayLevelEmphasis
		GLRLM	RunEntropy, LongRunHighGrayLevelEmphasis, LongRunLowGrayLevelEmphasis, LongRunEmphasis, ShortRunHighGrayLevelEmphasis
	LBP	First Order	RootMeanSquared, Mean
		GLDM	LargeDependenceEmphasis, LargeDependenceHighGrayLevelEmphasis, LongRunEmphasis, RunEntropy
	LoG (0.25mm)	First Order	Skewness
		GLCM	Autocorrelation, HighGrayLevelRunEmphasis, LowGrayLevelRunEmphasis, RunVariance, RunEntropy
	LoG (0.50mm)	GLCM	SumAverage, JointAverage, Autocorrelation
		GLDM	HighGrayLevelEmphasis, LowGrayLevelEmphasis, LargeDependenceLowGrayLevelEmphasis, LargeDependenceEmphasis, DependenceVariance, LongRunEmphasis, RunEntropy, LongRunLowGrayLevelEmphasis
	LoG (0.75mm)	First Order	Skewness
		GLCM	Autocorrelation, SumAverage, ClusterShade, JointAverage
		GLDM	HighGrayLevelEmphasis, LowGrayLevelEmphasis, LargeDependenceLowGrayLevelEmphasis, LargeDependenceEmphasis, DependenceVariance
		GLRLM	LongRunLowGrayLevelEmphasis, LowGrayLevelRunEmphasis, HighGrayLevelRunEmphasis, LongRunEmphasis, RunEntropy
		GLSZM	LowGrayLevelZoneEmphasis, HighGrayLevelZoneEmphasis
	LoG (1.25mm)	First Order	InterquartileRange
		GLCM	SumAverage, JointAverage, MaximumProbability, Autocorrelation, DependenceVariance, HighGrayLevelEmphasis, LargeDependenceEmphasis, LargeDependenceHighGrayLevelEmphasis
		GLRLM	ShortRunHighGrayLevelEmphasis, LongRunEmphasis, HighGrayLevelRunEmphasis
		NGTDM	Contrast, Complexity
	LoG (1.00mm)	GLCM	Autocorrelation, ClusterShade, SumAverage, Contrast, JointAverage, DifferenceAverage
		GLDM	LargeDependenceEmphasis, LargeDependenceHighGrayLevelEmphasis, LowGrayLevelEmphasis, GrayLevelNonUniformity, HighGrayLevelEmphasis, DependenceVariance
		GLRLM	HighGrayLevelRunEmphasis, LongRunLowGrayLevelEmphasis, RunEntropy, LongRunEmphasis, LowGrayLevelRunEmphasis, ShortRunHighGrayLevelEmphasis
	Original	First Order	Minimum, 90Percentile, Mean, RootMeanSquared, 10Percentile, Median
		GLDM	LargeDependenceHighGrayLevelEmphasis, LargeDependenceEmphasis
		GLRLM	RunEntropy, LongRunHighGrayLevelEmphasis
	Square	First Order	Median, RootMeanSquared, Mean, Variance, 90Percentile, MeanAbsoluteDeviation, InterquartileRange
		GLDM	LargeDependenceHighGrayLevelEmphasis, LargeDependenceEmphasis, LargeDependenceLowGrayLevelEmphasis
		GLRLM	LongRunHighGrayLevelEmphasis, RunEntropy, LongRunEmphasis, ShortRunHighGrayLevelEmphasis, LongRunLowGrayLevelEmphasis
	Squareroot	First Order	Mean, Minimum, Median, 90Percentile, 10Percentile, RootMeanSquared
		GLDM	LargeDependenceEmphasis, LargeDependenceHighGrayLevelEmphasis
		GLRLM	RunEntropy
